# Supplementary material
Source: PubMed Central journal article supplement (PMC8850983)

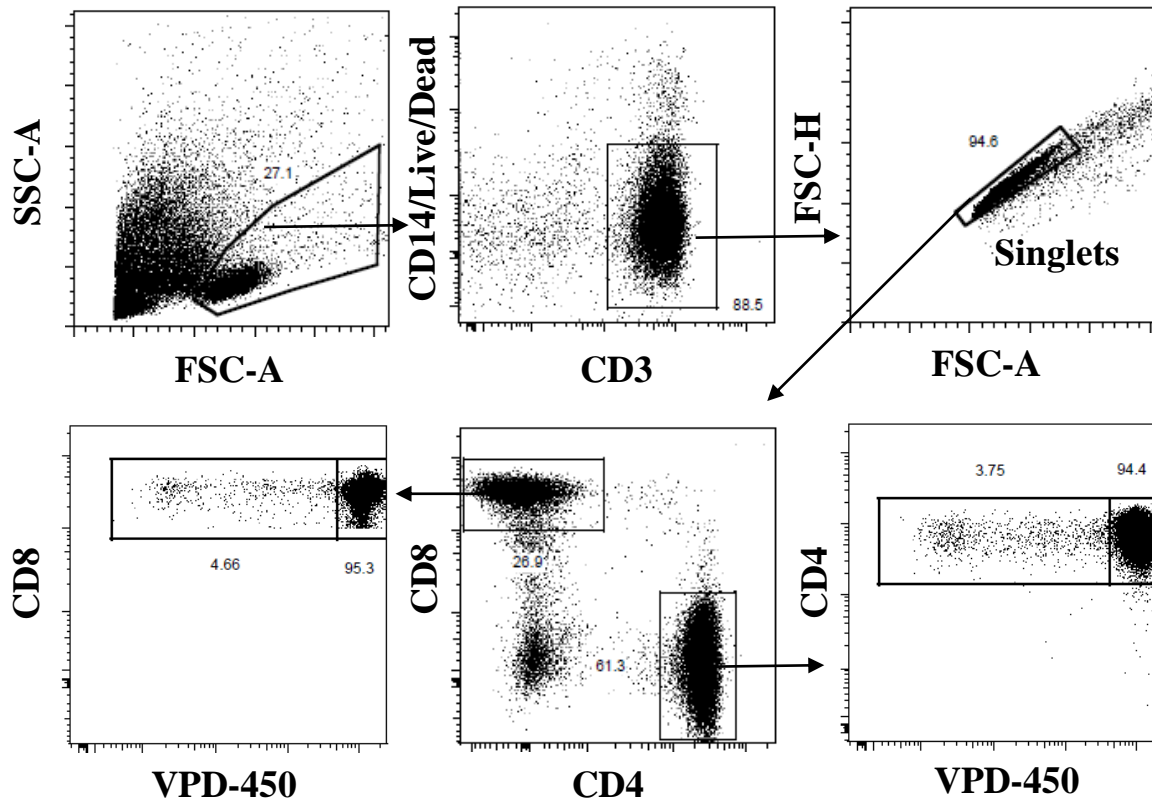

Supplement: NIHMS1776056-supplement-Figure_S1.pdf [file NIHMS1776056-supplement-Figure_S1.pdf]
